# Supplementary material
Source: MDPI journal article supplement (https://www.mdpi.com/2311-7524/10/5/469)
Supplement: s1 [file s1]

# Supplementary Materials

## Combining Transcriptome- and Metabolome-Analyzed Differentially Expressed Genes and Differential Metabolites in Development Period of *Caoyuanheimo-1* (*Agaricus* sp.) from Inner Mongolia, China

Hai-yan Wang <sup>1,2</sup>, Ya-nan Lu <sup>2</sup>, Ya-jiao Li <sup>2</sup>, Guo-qin Sun <sup>2</sup>, Yuan Wu <sup>2</sup>, Rui-qing Ji <sup>3</sup> and Wei Yan <sup>1,\*</sup>

<sup>1</sup> College of Forestry, Inner Mongolia Agricultural University, Hohhot 010031, China

<sup>2</sup> Vegetable and Flower Research Institute, Inner Mongolia Academy of Agricultural and Animal Husbandry Sciences, Hohhot 010031, China

<sup>3</sup> Engineering Research Center of Edible and Medicinal Fungi, Ministry of Education, Jilin Agricultural University, Changchun 130118, China

\* Correspondence: yanwei89911@163.com

### 1 Supplementary Data

**Figure S1.** Metabolome PCA analysis of HY and HZ(a), HY and HC(b), HZ and HC(c).

**Figure S2.** Statistics of transcripts and unigenes in transcriptome data.

**Figure S3.** Transcriptome PCA analysis of HY, HZ and HC.

**Figure S4.** Differentially expressed genes(DEGs) KEGG enrichment analysis of HY vs HC.

**Figure S5.** Differentially expressed genes(DEGs) KEGG enrichment analysis of HZ vs HC.

**Figure S6.** Differentially expressed genes(DEGs) KEGG enrichment analysis of HY vs HZ.

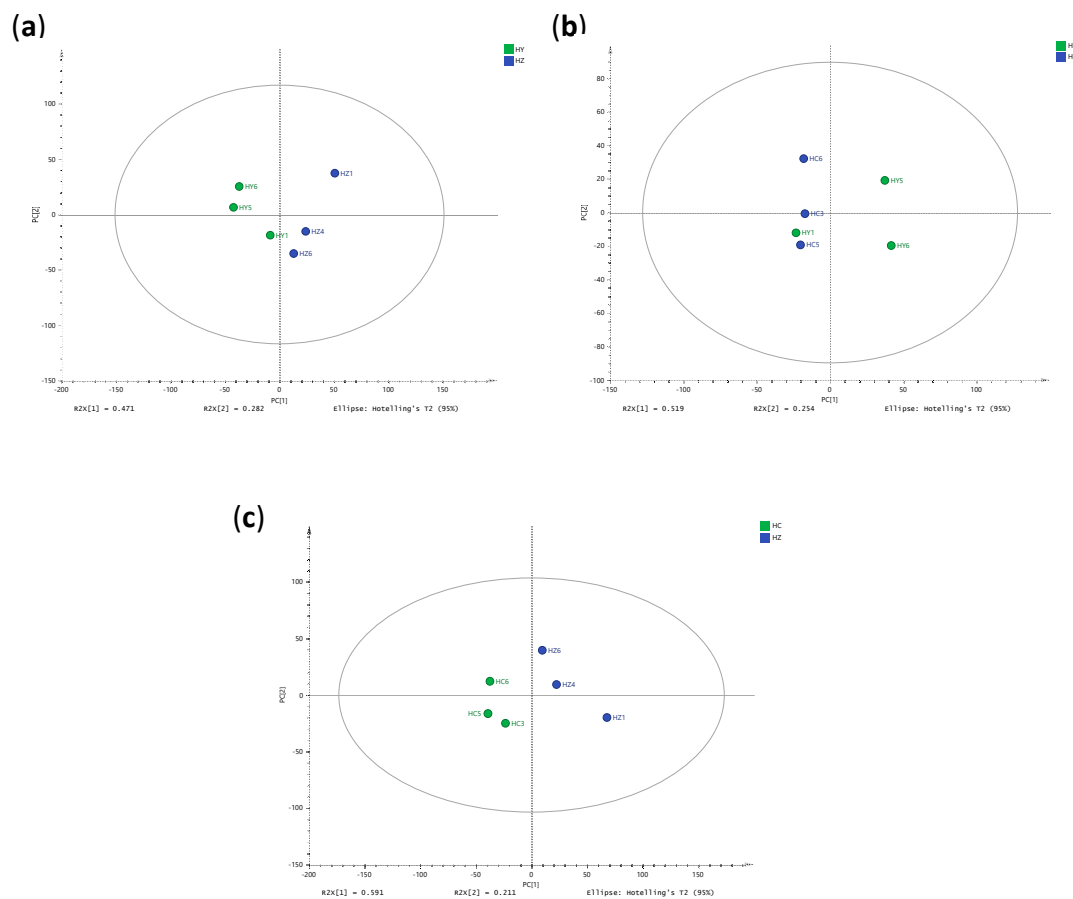

**Figure S1.** Metabolome PCA analysis of HY and HZ(a),HY and HC(b),HZ and HC(c).

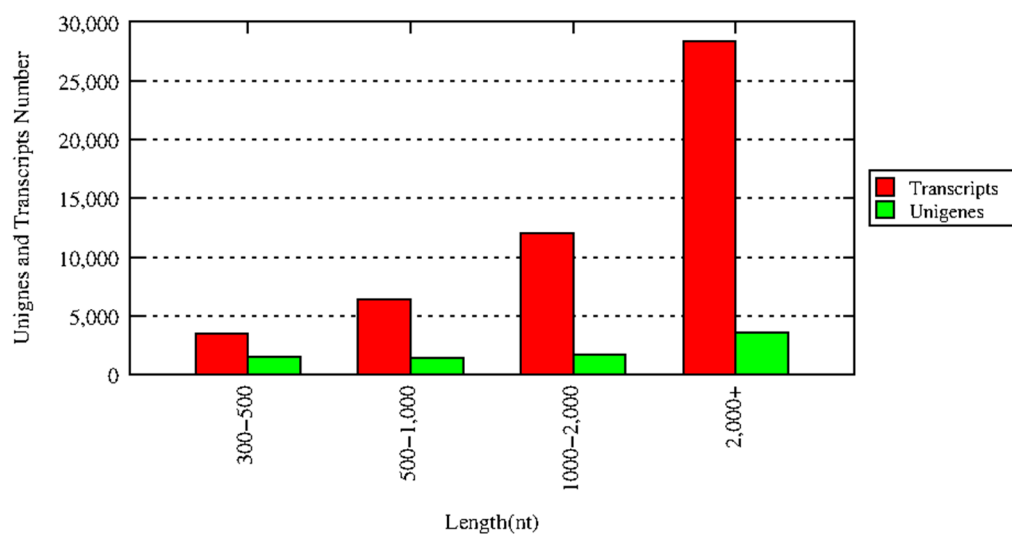

**Figure S2.** Statistics of transcripts and unigenes in transcriptome data. The X-axis represents different length intervals of Unigene; The Y-axis represents the number and proportion of Unigenes within a certain length range.

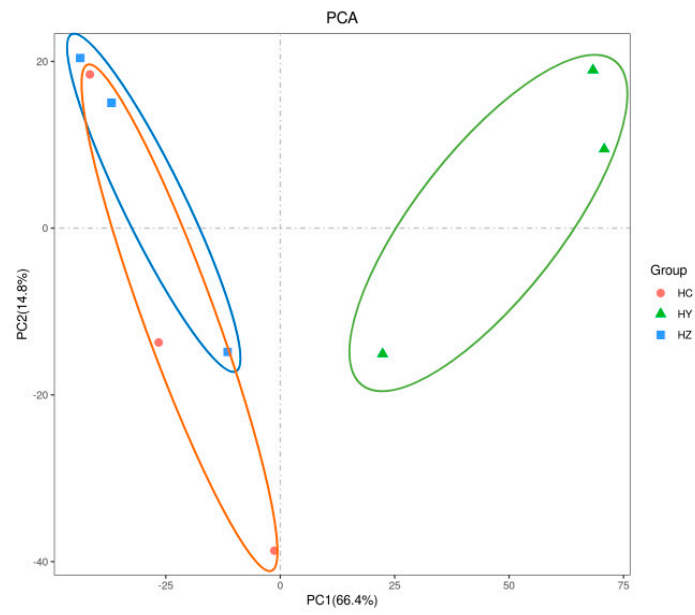

**Figure S3.** Transcriptome PCA analysis of HY, HZ and HC.

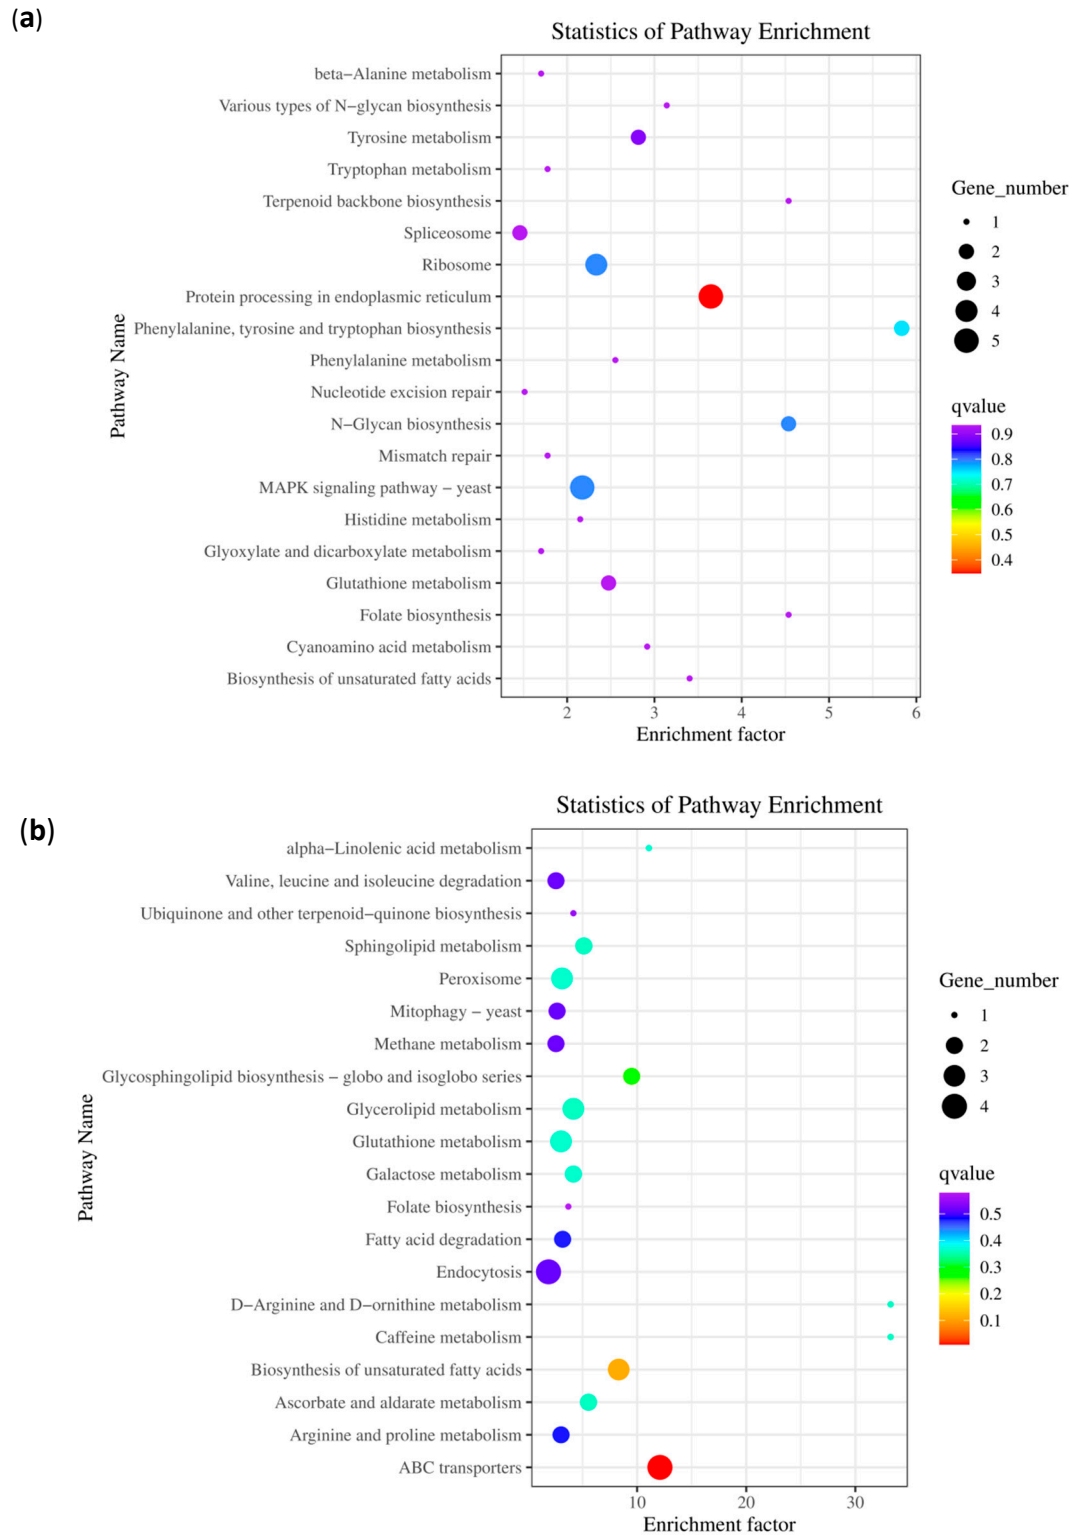

**Figure S4.** Differentially expressed genes(DEGs) KEGG enrichment analysis of HY vs HC. **(a)** The genes upregulated in HC in the HY vs HC group. **(b)** The genes downregulated in HC in the HY vs HC group.

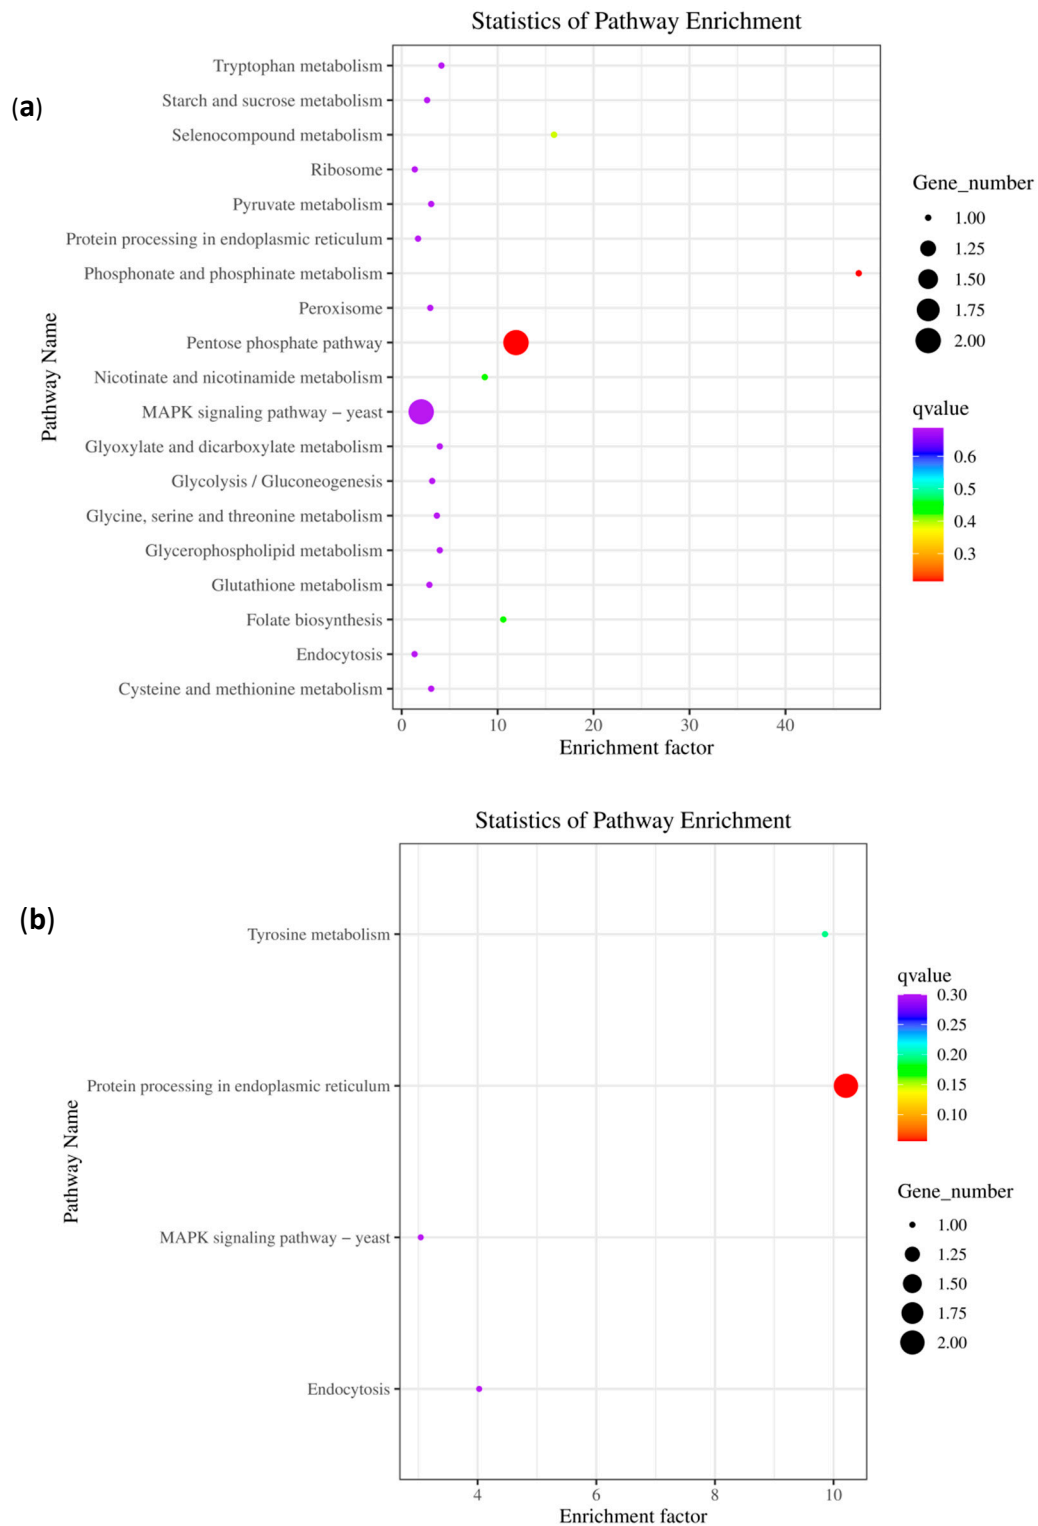

**Figure S5.** Differentially expressed genes(DEGs) KEGG enrichment analysis of HZ vs HC. **(a)** The genes upregulated in HC in the HZ vs HC group. **(b)** The genes downregulated in HC in the HZ vs HC group.

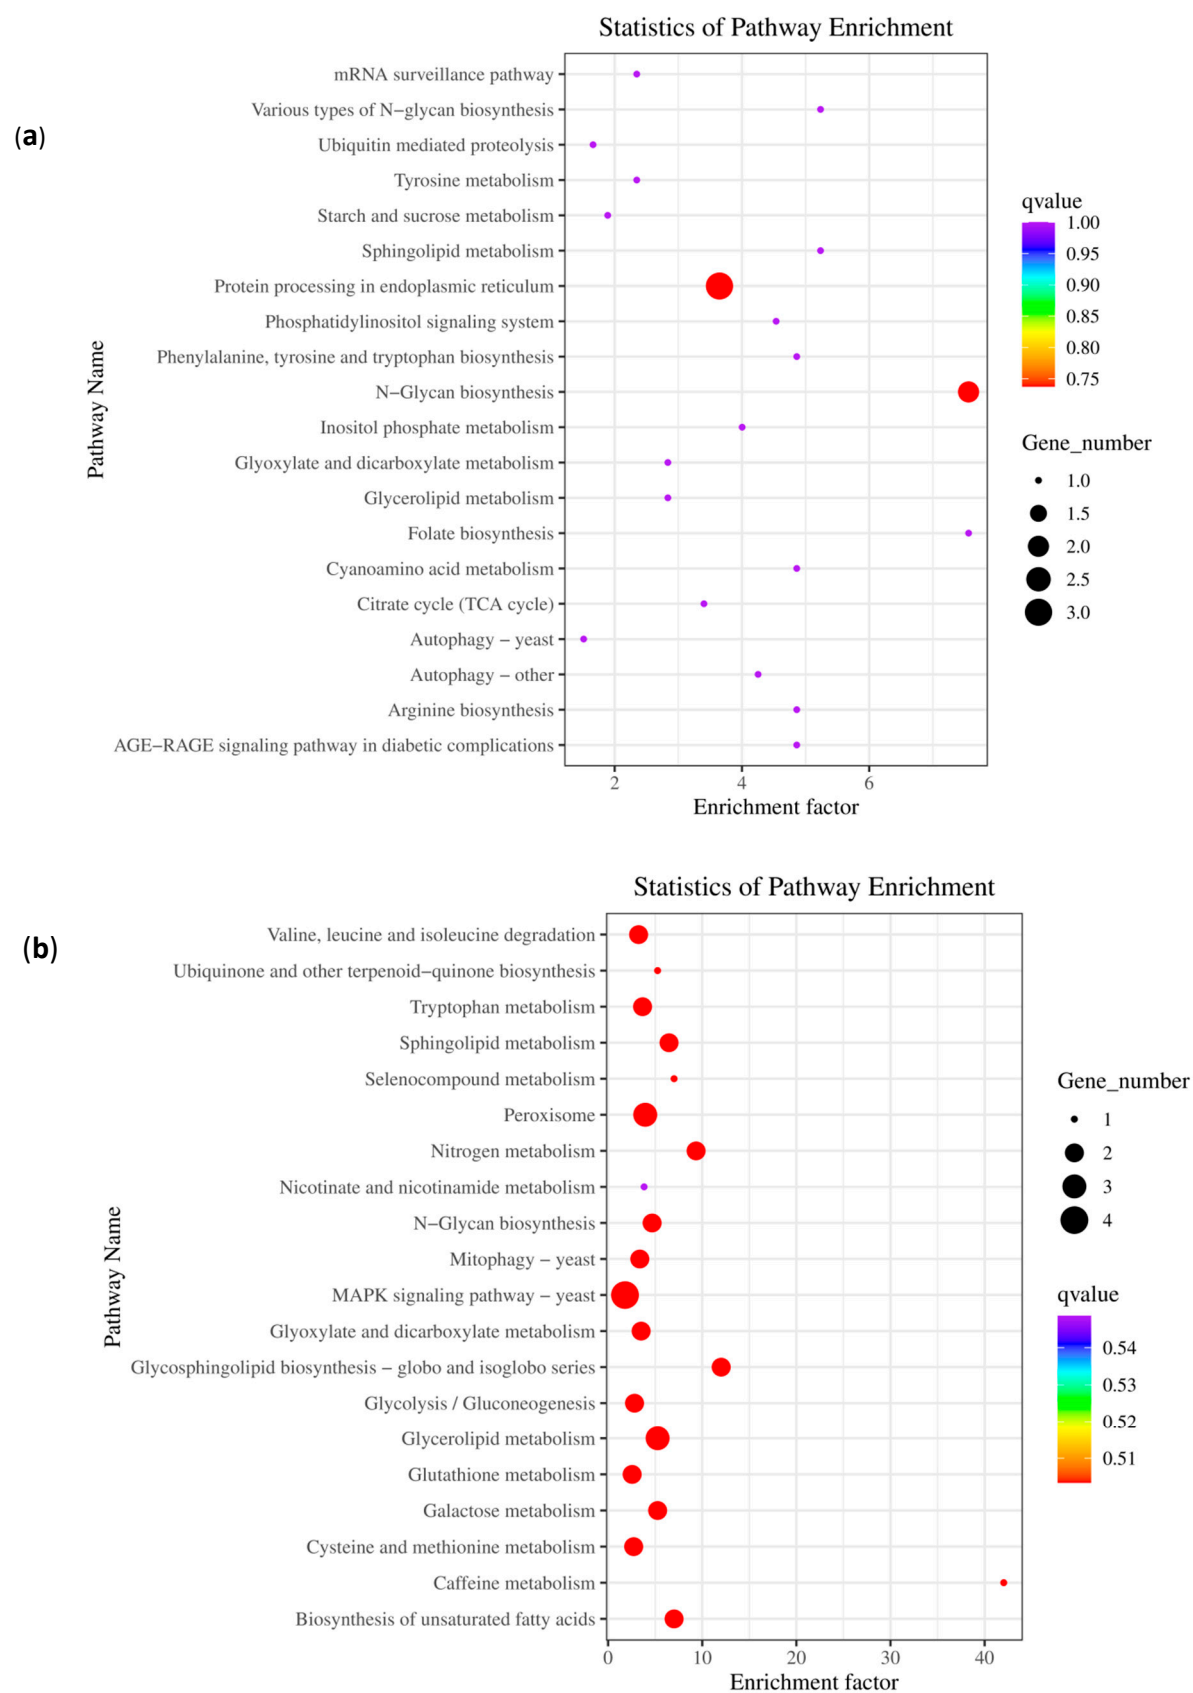

**Figure S6.** Differentially expressed genes(DEGs) KEGG enrichment analysis of HY vs HZ. **(a)** The genes upregulated in HZ in the HY vs HZ group. **(b)** The genes downregulated in HZ in the HY vs HZ group.
